# Supplementary material for: Flotillin-1 promotes EMT of gastric cancer via stabilizing Snail
Source: PeerJ. 2022 Aug 15;10:e13901. doi: 10.7717/peerj.13901 (PMC9387518; doi:10.7717/peerj.13901)
Supplement: Supplemental Information 2 [file peerj-10-13901-s002.xlsx]

## Sheet: Figure 2A
qRT-PCR
	Vector			Flotillin-1
Relative Flotillin-1 mRNA level	1.051	0.997	0.987	120.33	131.22	124.42

## Sheet: Figure 2B
WB
	Vector			Flotillin-1
Relative Flotillin-1 protein level	0.658	0.795	1.547	8.533	6.48	4.526

## Sheet: Figure 2C
qRT-PCR
	Vector			Flotillin-1
Relative Flotillin-1 mRNA level	0.998	1.001	0.988	150.8	151.22	152.12

## Sheet: Figure 2D
WB
	Vector			Flotillin-1
Relative Flotillin-1 protein level	0.894231	1.26923	0.836538	7.123	6.331	3.211

## Sheet: Figure 2E
	Vector			Flotillin-1
Migration	322	378	333	2333	1899	2122
Invasion	344	311	244	2000	2911	2444

## Sheet: Figure 2G
	Vector			Flotillin-1
Migration	522	578	533	3452	3819	4222
Invasion	444	411	444	3012	3678	2989

## Sheet: Figure 3A
qRT-PCR
	NC			shFlotillin-1-1			shFlotillin-1-2
Relative Flotillin-1 mRNA level	1.151	0.947	0.987	0.0622	0.0654	0.0688	0.0855	0.0867	0.0812

## Sheet: Figure 3B
WB
	NC			shFlotillin-1-1			shFlotillin-1-2
Relative Flotillin-1 protein level	0.841935	0.948387	1.20968	0.356	0.563	0.541	0.389	0.671	0.602

## Sheet: Figure 3C
qRT-PCR
	NC			shFlotillin-1-1			shFlotillin-1-2
Relative Flotillin-1 mRNA level	0.999	1.014	0.987	0.173	0.165	0.198	0.243	0.186	0.221

## Sheet: Figure 3D
WB
	NC			shFlotillin-1-1			shFlotillin-1-2
Relative Flotillin-1 protein level	1.2	0.846429	0.953571	0.231	0.654	0.532	0.302	0.541	0.501

[truncated: 12 more sheets: Figure 3E, Figure 3G, Figure 4A, Figure 4B, Figure 4C, Figure 4D, Figure 4E, Figure 4F, Figure 4G, Figure 4H, Figure 5C, Figure 5D]
